# Supplementary figures and images for: A Single Dose Intraperitoneal Injection of <em>P. gingivalis</em> Outer Membrane Vesicle (OMV) Stimulated Expressions of Neuroinflammatory Markers and Histopathological Changes in the Brain of Adult Zebrafish
Source: Preprints.org preprint supplement (doi:10.20944/preprints202408.1703.v1), 2024-08-25

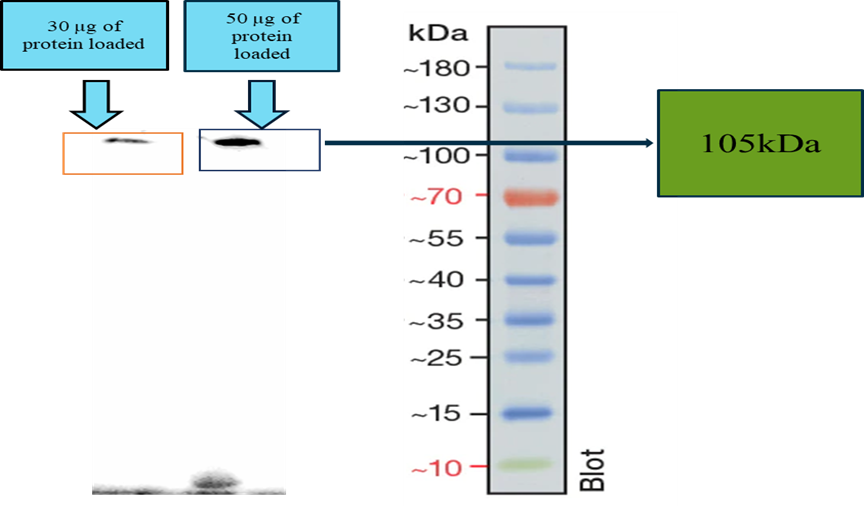


Figure S1 Western blot analysis showed the detection of gingipain.

Supplement: Supplementary file 1 [file supplementary]
